# Supplementary material for: Transcriptome and Metabolome Analysis Reveal the Flavonoid Biosynthesis Mechanism of Abelmoschus manihot L. at Different Anthesis Stages
Source: MDPI journal article supplement (doi:10.3390/metabo13020216), 2023-02-01
Supplement: s1 [file s1]

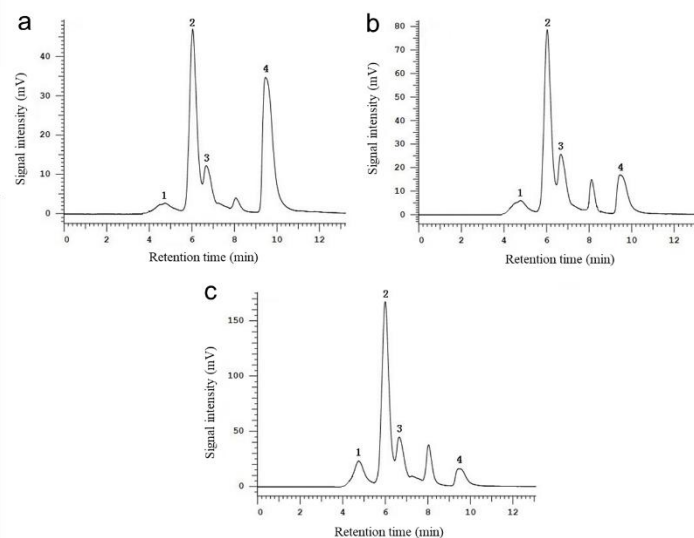

**Figure S1.** Chromatograms of flavonoids in *Abelmoschus manihot* L. at different flowering periods. a. T1 period, b. T2 period, c. T3 period. The peak numbers in the figure are represent vitexin rhamnoside (1), hyperoside (2), rutin (3), and quercetin (4).

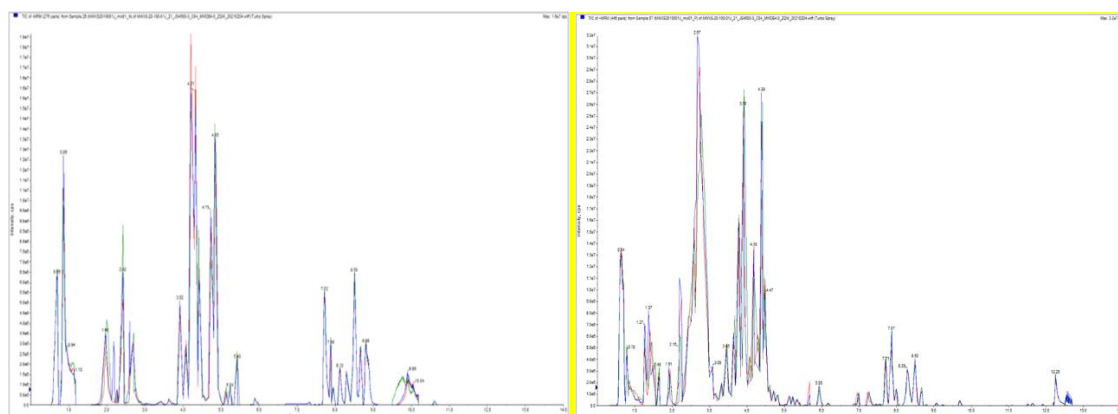

**Figure S2.** Overlap of TIC maps by mass spectrometry for QC samples.

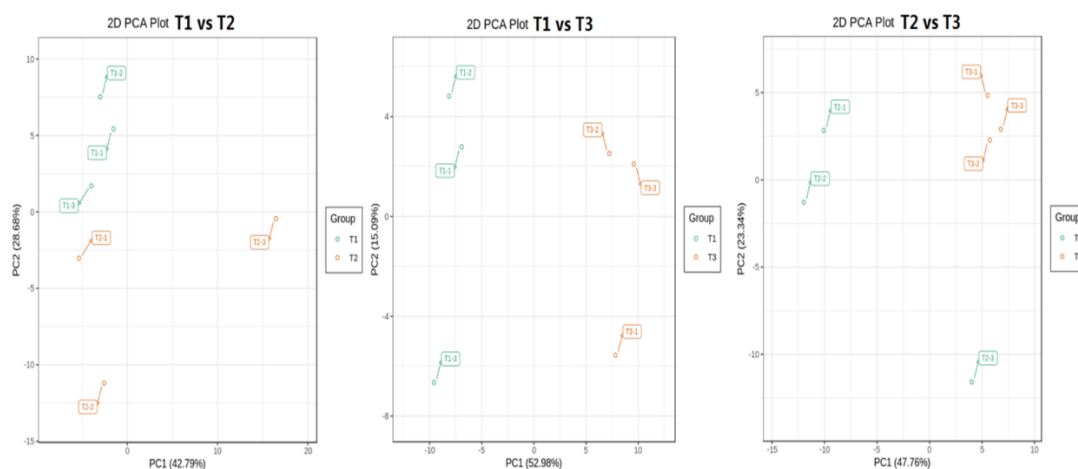

**Figure S3.** Grouped principal component analysis diagram of HSK flower groups.

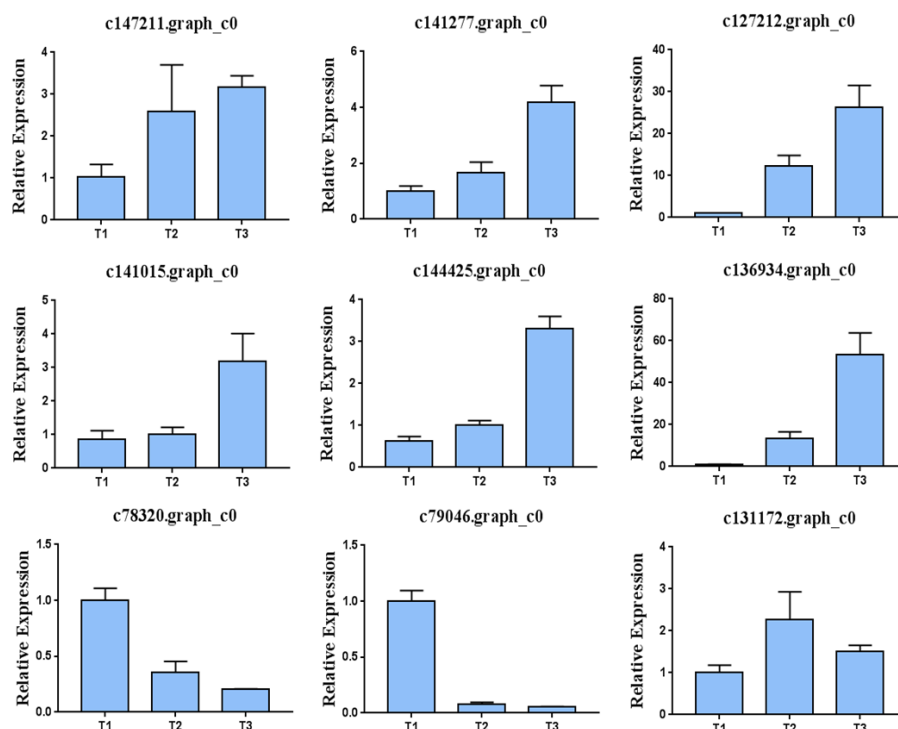

**Figure S4.** Expression analysis of 9 differentially expressed genes related to flavonoid and anthocyanin biosynthesis of *Abelmoschus manihot* L. by RT-PCR.

**Table S1.** Primer information in *Abelmoschus manihot* L.

| Number | Gene name        |         | Sequence (5'to3')        |
|--------|------------------|---------|--------------------------|
| 1      | c147211.graph_c0 | Forward | AGCAGCCGAGTAAAAGTGTAGTG  |
|        |                  | Reverse | GTTCCGCCTGTTTCCTTGATAG   |
| 2      | c141277.graph_c0 | Forward | AGCAGCCGAGTAAAAGTGTAGTG  |
|        |                  | Reverse | GTTCCGCCTGTTTCCTTGATAG   |
| 3      | c127212.graph_c0 | Forward | CGACGGCACCAAAGGAAGA      |
|        |                  | Reverse | GCGTTGAGGTATGACGGGAG     |
| 4      | c141015.graph_c0 | Forward | CCAGAAGTCCGACGAAGGTAG    |
|        |                  | Reverse | CATCAGTTCATCTGTTTGCTTACC |
| 5      | c144425.graph_c0 | Forward | GAGCAAAGAGTAGACAACGCAAGT |
|        |                  | Reverse | TCCGATGGCTACGAAGACG      |
| 6      | c136934.graph_c0 | Forward | CGAAAGTCTGGGATGAACCG     |
|        |                  | Reverse | CCTGCCCAAACCAAAAGG       |
| 7      | c78320.graph_c0  | Forward | TTGGAGTGTACCTTGAACCTGAA  |
|        |                  | Reverse | TCCGTATTGGGAACCTTTGAT    |
| 8      | c79046.graph_c0  | Forward | CAGATGTTTGTCTGTTGGGCTTAG |
|        |                  | Reverse | GGCACGGCGGATAGTAGTTG     |
| 9      | c131172.graph_c0 | Forward | ATACACTGCTGGGGCTTGC      |
|        |                  | Reverse | AGGGTTTCATCTTCTCGTCCA    |
| 10     | AeActin          | Forward | TCTTTCATCGGGATGGAAGC     |
|        |                  | Reverse | ACTGAGCACAATGTTACCGTAGAG |

**Table S2.** Retention time of flavonoids under chromatographic conditions.

| Flavonoid components                                      |       | Retention time (min) |       |       |       |       | RSD% |
|-----------------------------------------------------------|-------|----------------------|-------|-------|-------|-------|------|
| Vitexin<br>rhamnoside<br>hyperoside<br>rutin<br>quercetin | 4.767 | 4.720                | 4.720 | 4.713 | 4.713 | 4.700 | 0.49 |
|                                                           | 6.060 | 6.007                | 6.007 | 6.000 | 6.020 | 6.013 | 0.36 |
|                                                           | 6.693 | 6.597                | 6.593 | 6.667 | 6.667 | 6.600 | 0.66 |
|                                                           | 9.367 | 9.333                | 9.333 | 9.327 | 9.340 | 9.327 | 0.16 |
|                                                           |       |                      |       |       |       |       |      |

**Table S3.** Statistics of clean data.

| Sample | Number | Clean Data | Base Number   | GC Content/% | %≥Q30/% | Mapped Reads | Mapped Ratio |
|--------|--------|------------|---------------|--------------|---------|--------------|--------------|
| T1     | TI-1   | 29,954,755 | 8,975,679,212 | 44.63%       | 93.29%  | 22,652,772   | 75.62%       |
|        | TI-2   | 31,494,074 | 9,435,692,670 | 44.63%       | 93.15%  | 24,065,676   | 76.41%       |
|        | TI-3   | 25,895,161 | 7,757,881,574 | 45.05%       | 93.32%  | 19,952,827   | 77.05%       |
| T2     | T2-1   | 20,508,922 | 6,133,731,396 | 44.89%       | 92.79%  | 15,589,259   | 76.01%       |
|        | T2-2   | 27,340,890 | 8,188,656,882 | 44.64%       | 92.99%  | 21,121,627   | 77.25%       |
|        | T2-3   | 21,049,137 | 6,306,521,812 | 44.84%       | 93.01%  | 15,889,133   | 75.49%       |
| T3     | T3-1   | 27,398,536 | 8,209,257,194 | 46.33%       | 92.63%  | 19,634,228   | 71.66%       |
|        | T3-2   | 25,118,324 | 7,522,635,622 | 44.24%       | 92.89%  | 18,789,291   | 74.80%       |
|        | T3-3   | 23,132,799 | 6,928,801,232 | 45.38%       | 92.65%  | 16,841,642   | 72.80%       |
